# Supplementary material for: Exceptionally high NLO response and deep ultraviolet transparency of superalkali doped macrocyclic oligofuran rings
Source: Royal Society of Chemistry journal article supplement (doi:10.1039/c9nj05065e), 2020-01-01
Supplement: c9nj05065e1.pdf [file c9nj05065e1.pdf]

Supplementary information

$OLi_3@nCF$

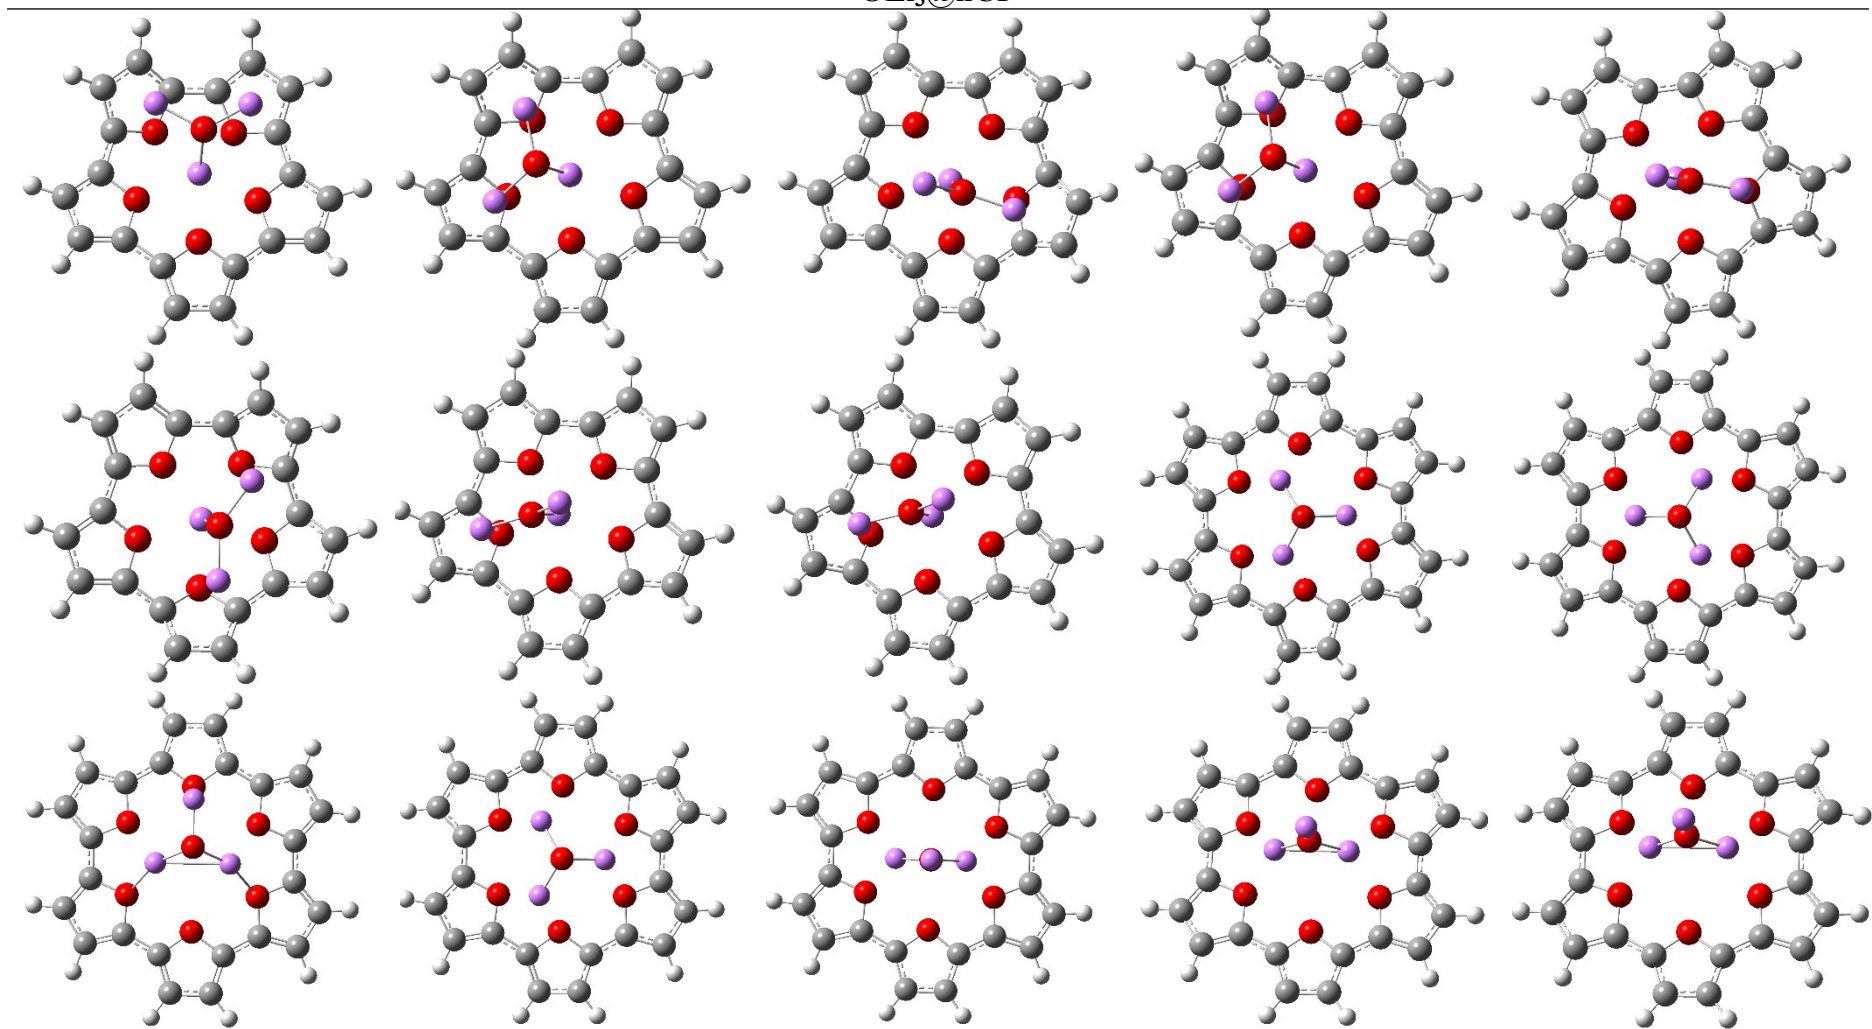

**Fig. S1a.** All the possible optimized geometries of  $OLi_3@nCF$  complexes.

---

$\text{ONa}_3@\text{nCF}$

---

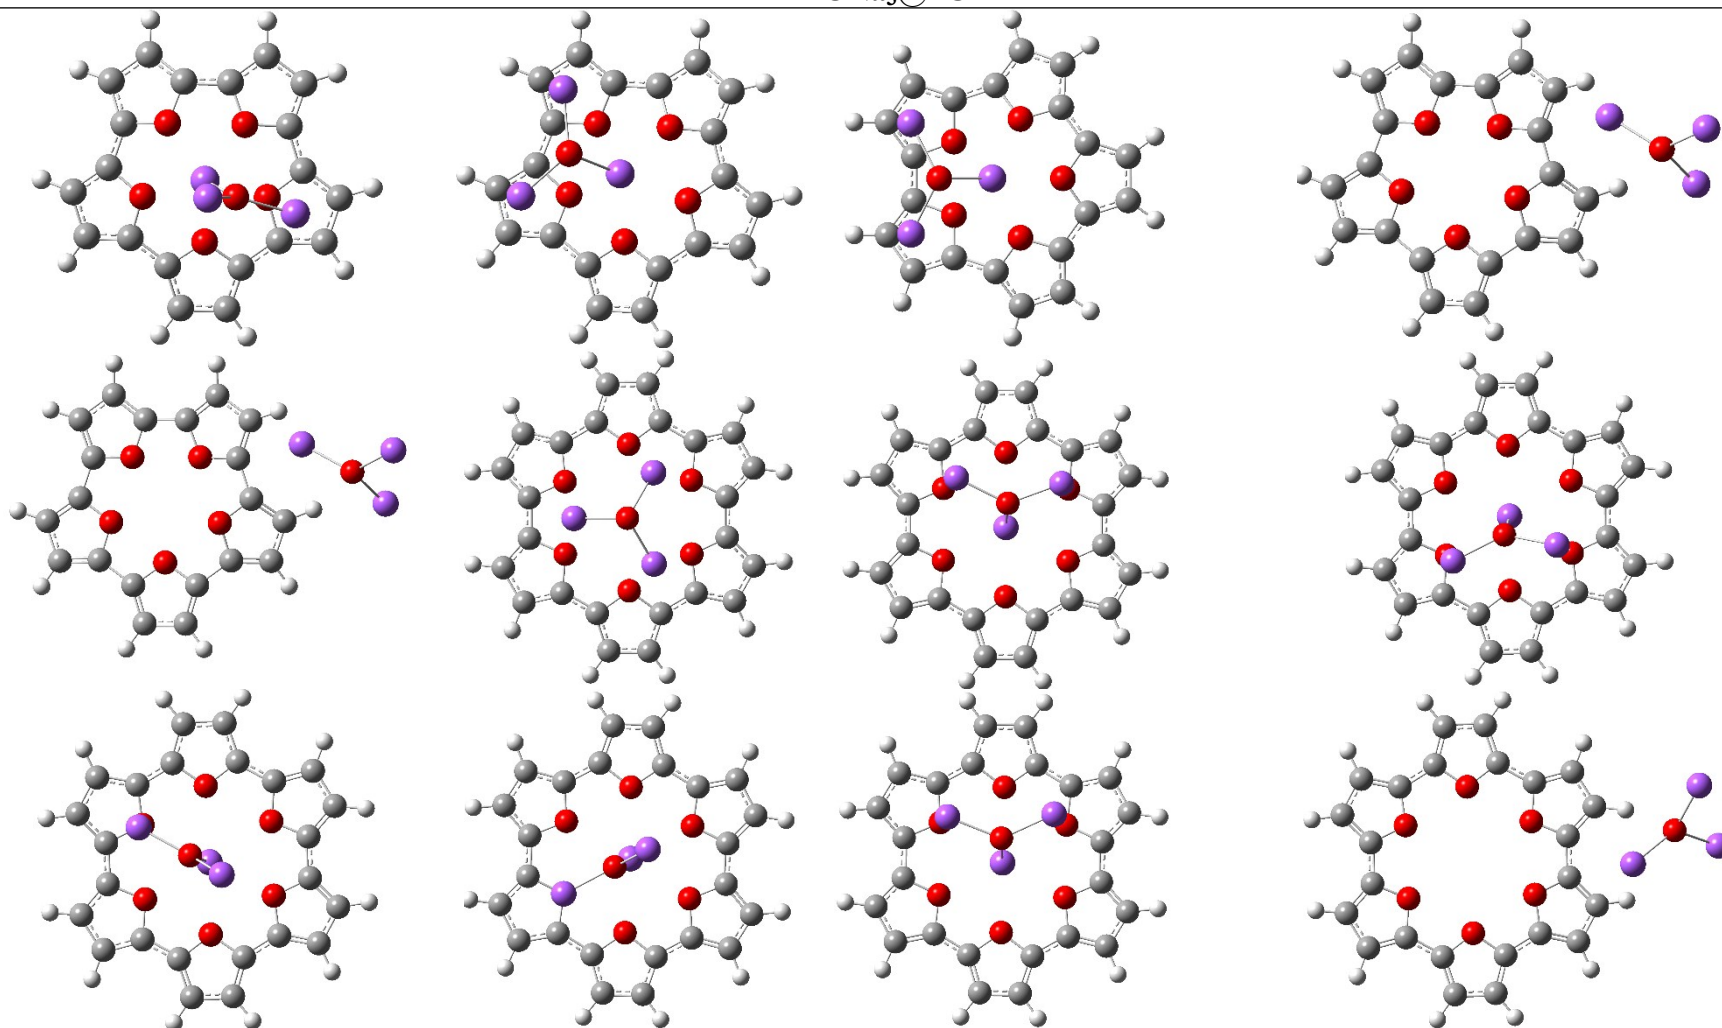

**Fig. S1b.** All the possible optimized geometries of  $\text{ONa}_3@\text{nCF}$  complexes.

---

$\text{OK}_3@n\text{CF}$

---

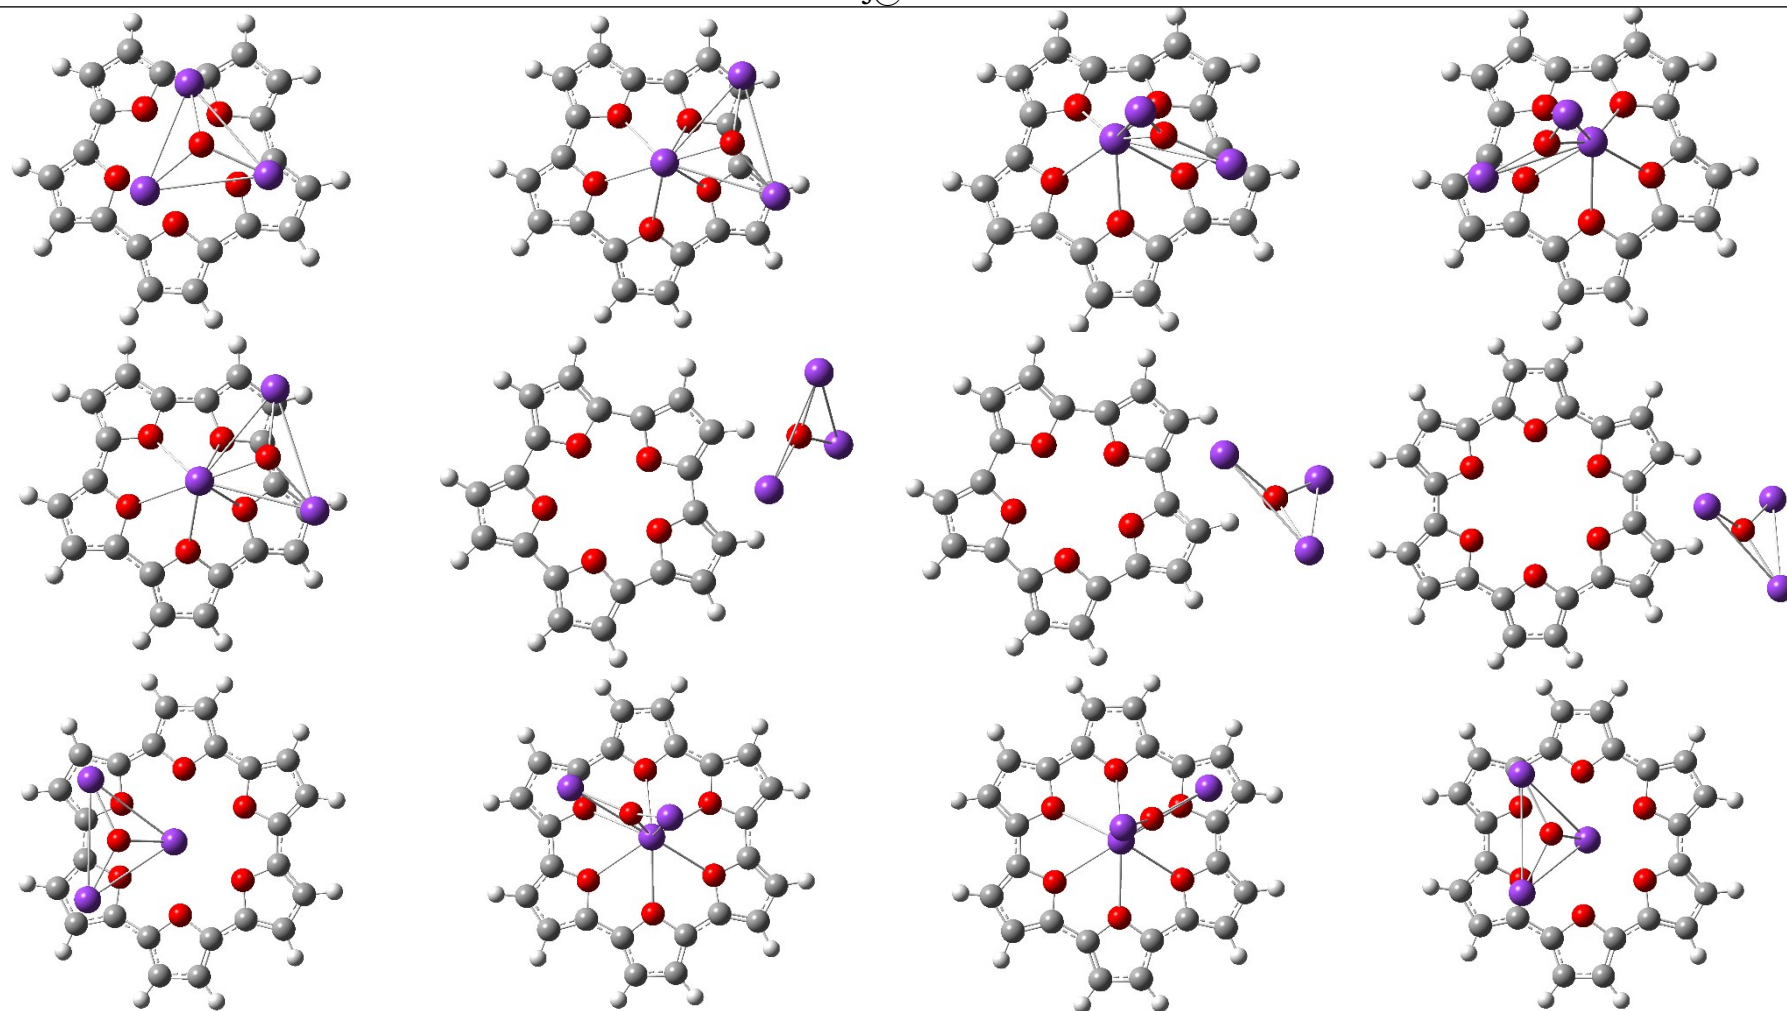

**Fig. S1c.** All the possible optimized geometries of  $\text{OK}_3@n\text{CF}$  complexes.

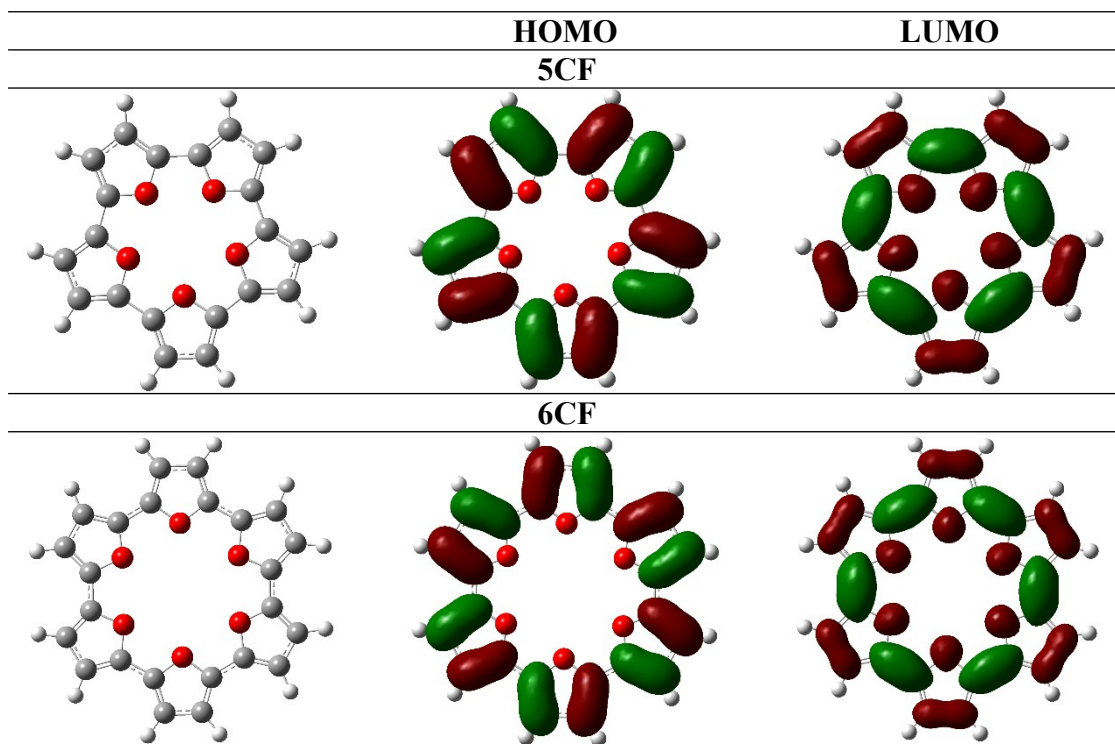

Figure S2.

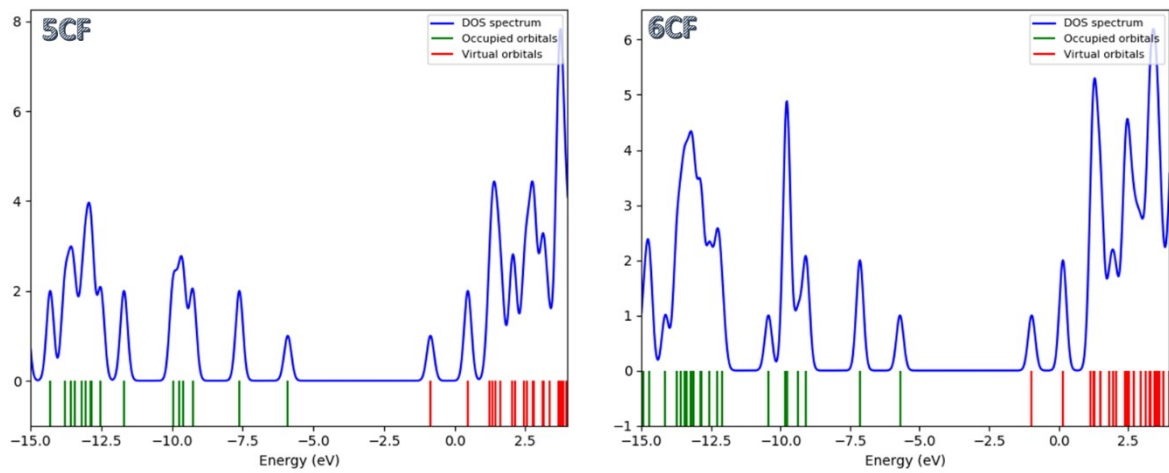

**Figure S3.** DOS spectra of isolated nCF.
